# Supplementary material for: Aluminum tolerance mechanisms in Kenyan maize germplasm are independent from the citrate transporter ZmMATE1
Source: PubMed Central journal article supplement (PMC7193623; doi:10.1038/s41598-020-64107-z), 2020-04-30
Supplement: 41598_2020_64107_MOESM1_ESM.pdf [file 41598_2020_64107_MOESM1_ESM.pdf]

## **Aluminum tolerance mechanisms in Kenyan maize germplasm are independent from the citrate transporter ZmMATE1**

Thomas K. Matonyei<sup>1</sup>, Beatriz A. Barros<sup>2</sup>, Roberta G.N. Guimaraes<sup>3</sup>, Evans O. Ouma<sup>4</sup>, Reuben K. Cheprot<sup>5</sup>, Leandro C. Apolinário<sup>6</sup>, Dickson O. Ligeyo<sup>7</sup>, Marcella B. R. Costa<sup>8</sup>, Beatrice A. Were<sup>5</sup>, Peter O. Kisinyo<sup>4</sup>, Augustino O. Onkware<sup>4</sup>, Roberto W. Noda<sup>2</sup>, Samuel O. Gudu<sup>4</sup>, Jurandir V. Magalhaes<sup>2</sup>, and Claudia T. Guimaraes<sup>2\*</sup>

<sup>1</sup> University of Kabianga, Agroforestry and Rural Development Department, Kericho, P.O. Box 2030-20200, Kenya

<sup>2</sup> Embrapa Milho e Sorgo, Rodovia MG 424 km 65, Sete Lagoas, 35701-970, Brazil

<sup>3</sup> Universidade Federal de São João del Rei, Campus Sete Lagoas, Rodovia MG 424 km 47, Sete Lagoas, 35701-970, Brazil. Current address: Agrocere, Sorriso, MT, Brazil

<sup>4</sup> Rongo University, P.O. Box 103-40404, Rongo, Kenya

<sup>5</sup> University of Eldoret, P.O. Box 125-30100, Eldoret, Kenya

<sup>6</sup> Faculdade Ciências da Vida, Av. Prefeito Alberto Moura, 12632, Sete Lagoas, MG, Brazil

<sup>7</sup> Kenya Agricultural Research Institute, P.O. Box 450-30200, Kitale, Kenya

<sup>8</sup> Universidade Federal de Minas Gerais, Departamento de Biologia Geral, Av. Antônio Carlos, 6627, Belo Horizonte, 31270-901, Brazil

\* Corresponding author: [claudia.guimaraes@embrapa.br](mailto:claudia.guimaraes@embrapa.br)

## Supplementary material

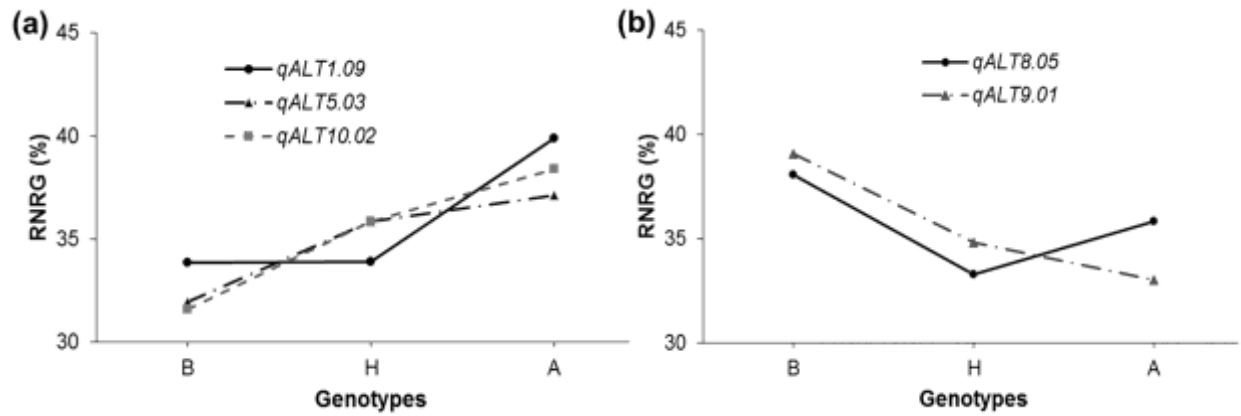

**Supplementary Figure S1. Relative net root growth (RNRG %) mean for F<sub>2:3</sub> progeny showing genotypic classes of the AI tolerance QTLs alleles.** Progeny homozygous for the allele donated by the AI-sensitive parent, SCH3, are shown in B, whereas progeny homozygous B for the AI-tolerant parent, 203B-14, are shown in A. Means for heterozygous are shown in H. **(a)** QTLs with favorable allele derived from 203B-14. **(b)** QTLs with favorable allele derived from SCH3.

**Supplementary Table S1. Variance analysis for relative net root growth in the F<sub>2:3</sub> families derived from the cross 203B-14 x SCH3.**

| <b>Source of Variation</b>                   | <b>D.F.<sup>a</sup></b> | <b>M.S.<sup>b</sup></b> | <b>F<sup>c</sup></b> |
|----------------------------------------------|-------------------------|-------------------------|----------------------|
| Experiments                                  | 5                       | 1650.29                 | 157.32**             |
| Replicates/Experiments                       | 12                      | 26.86                   | 2.56*                |
| Checks x Experiments                         | 5                       | 103.66                  | 9.88**               |
| Families adjusted                            | 183                     | 715.48                  | 68.11**              |
| Checks                                       | 1                       | 50912.11                | 4853.39**            |
| Families                                     | 176                     | 357.79                  | 34.11**              |
| Checks x Families                            | 6                       | 2841.73                 | 270.90**             |
| Residual                                     | 376                     | 10.49                   |                      |
| Families Mean                                |                         | 35.21                   |                      |
| Coefficient of genetic variation (CVg%)      |                         | 20.24                   |                      |
| Coefficient of experimental variation (CVe%) |                         | 8.82                    |                      |
| Broad sense heritability ( $H^2$ )           |                         | 0.97                    |                      |

<sup>a</sup> D.F. degrees of freedom

<sup>b</sup> M.S. mean square

<sup>c</sup> \*,\*\* Significant at  $p \leq 0.05$  and  $0.01$ , respectively.

**Supplementary Table S3. Maize predicted proteins similar to the Al tolerance genes previously characterized in plants (*ZmMATE1*, *OsNrat1*, *SbWRKY1* and *OsART1*).** Percent of identity is based protein sequence alignment and genomic positions are in base pairs (bp).

| Al Tolerance Gene          | Gene ID <sup>a</sup>       | Identity (%) | Chromosome | Position (bp) |
|----------------------------|----------------------------|--------------|------------|---------------|
| ZmMATE1<br>(GRMZM5G870170) | GRMZM2G163154<br>(ZmASL)   | 56.4         | 1          | 27,099,590    |
|                            | GRMZM5G890665              | 43.3         | 2          | 153,549,513   |
|                            | GRMZM2G080450              | 40.3         | 3          | 57,084,587    |
|                            | GRMZM2G065154<br>(ZmMATE3) | 21.9         | 5          | 71,724,077    |
|                            | GRMZM2G170128<br>(ZmMATE2) | 21.8         | 5          | 20,622,821    |
| OsNrat1<br>(Os02g03900)    | GRMZM2G168747<br>(ZmNrat1) | 81.8         | 5          | 74,616,918    |
|                            | GRMZM2G147560              | 60.3         | 7          | 26,963,762    |
|                            | GRMZM2G366919              | 52.6         | 2          | 170,851,138   |
|                            | GRMZM2G069198              | 49.5         | 5          | 43,146,138    |
| SbWRKY1<br>(Sb09g023500)   | GRMZM2G034421<br>(ZmWRKY)  | 80.1         | 8          | 118,496       |
|                            | GRMZM2G003551              | 30.3         | 9          | 18,108,182    |
|                            | GRMZM2G004060              | 25.4         | 10         | 12,108,516    |
| OsART1<br>(Os12g0170400)   | GRMZM2G068710<br>(ZmART1)  | 59.4         | 10         | 10,146        |
|                            | GRMZM2G075956              | 48.6         | 8          | 165,627       |
|                            | GRMZM2G129428              | 46.8         | 3          | 174,504       |

<sup>a</sup> Gene names in parenthesis were given by Krill *et al.* (2010) for *ZmASL*, Maron *et al.* (2010) for *ZmMATE2* and the others genes are described in this current work.

#### References

Krill, A. M., Kirst, M., Kochian, L. V., Buckler, E. S. & Hoekenga, O. A. Association and linkage analysis of aluminum tolerance genes in maize. *Plos One*, e9958 (2010).

Maron, L. G. et al. Two functionally distinct members of the MATE (multi-drug and toxic compound extrusion) family of transporters potentially underlie two major aluminum tolerance QTLs in maize. *Plant J.* **61**, 728-40 (2010).

**Supplementary Table S4. Sequence of the primers used for the expression analysis using quantitative RT-PCR of each candidate gene mapped within the AI tolerance QTLs.**

| <b>Gene ID</b>  | <b>Name</b>    | <b>Primer Sequence 5'-3'</b>                           |
|-----------------|----------------|--------------------------------------------------------|
| GRMZM2G065154   | <i>ZmMATE3</i> | F - ATGACGTCCAAGGTGGCATT<br>R- TGATGGGCTGCAAGCGTTAT    |
| GRMZM2G168747   | <i>ZmNrat</i>  | F - CGCGCTTCTGATCCAAACA<br>R - GCGAGATGCTTGCCTGTCTT    |
| GRMZM2G034421   | <i>ZmWRKY</i>  | F - AGCTCATCCCGGAGCCTAA<br>R - GGAGAGCGACGACTCCATAG    |
| GRMZM2G068710   | <i>ZmART1</i>  | F - CCCGTCACTGAAGAACTCGT<br>R - TCGCATTAGGCACTAGGCTC   |
| <i>18S rRNA</i> |                | F - CGTCCTAGTCTCAACCATAAACG<br>R - CCCCAGGAACCCAAAGACT |
